# Supplementary material for: The Mitochondrial Fission Regulator DRP1 Controls Post-Transcriptional Regulation of TNF-α
Source: PubMed Central journal article supplement (PMC7840702; doi:10.3389/fcimb.2020.593805), 2021-01-14
Supplement: Image_1.pdf [file Image_1.pdf]

**Fig. S1**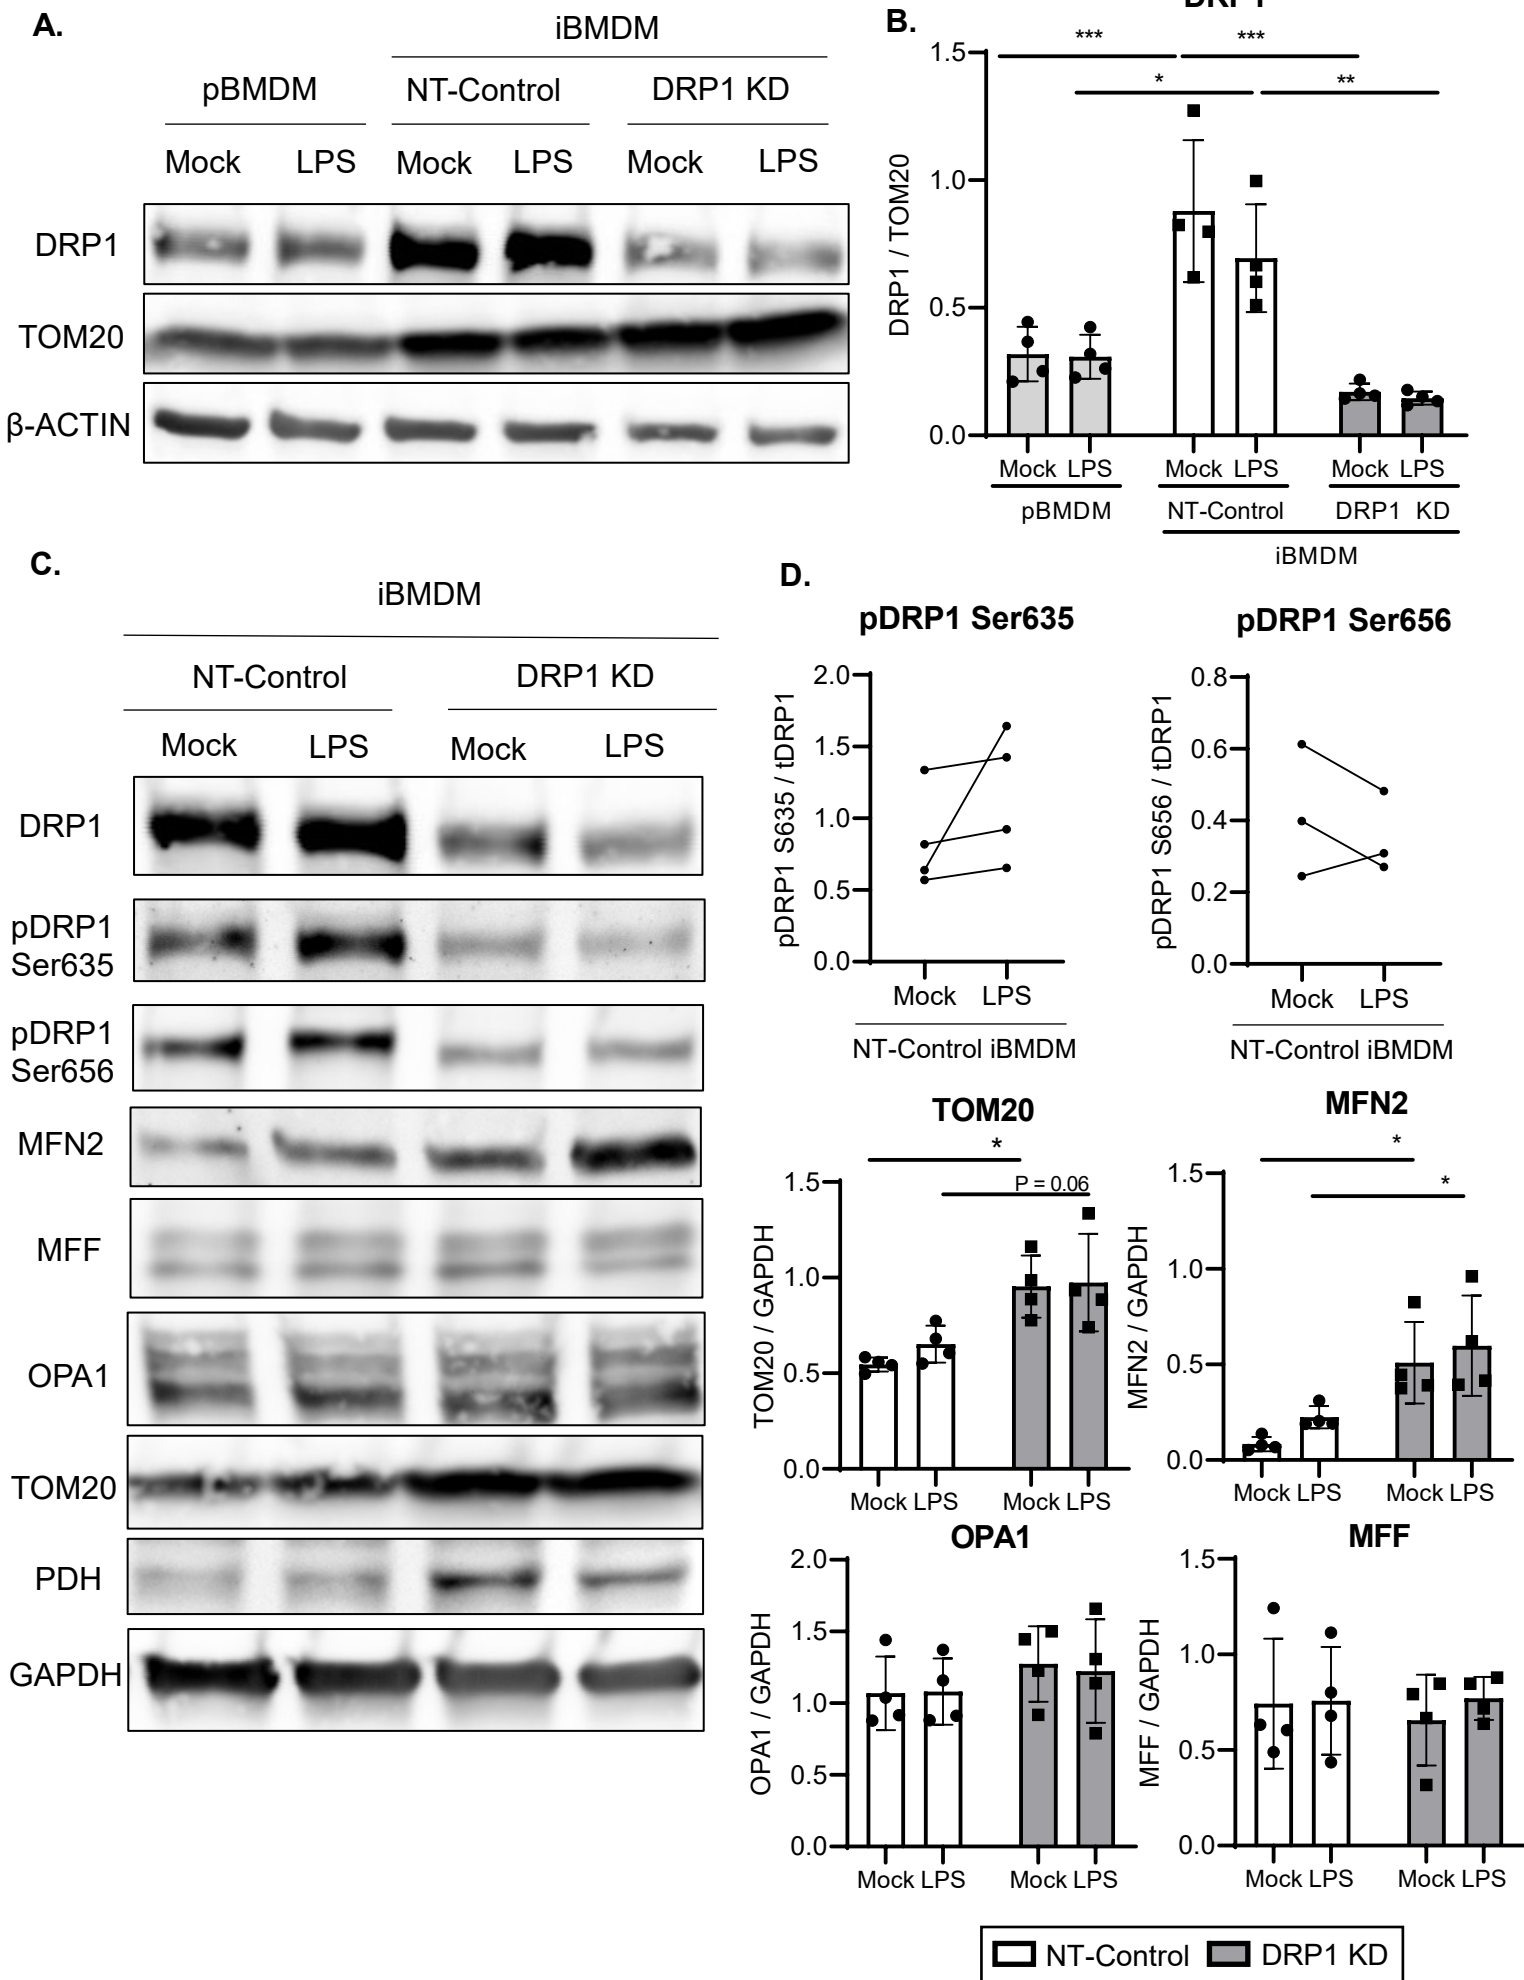

Fig. S2

A.

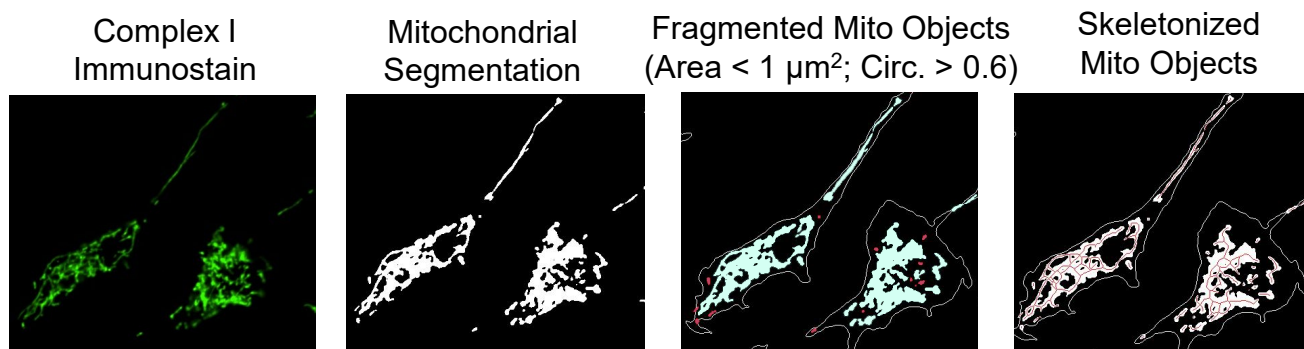

B.

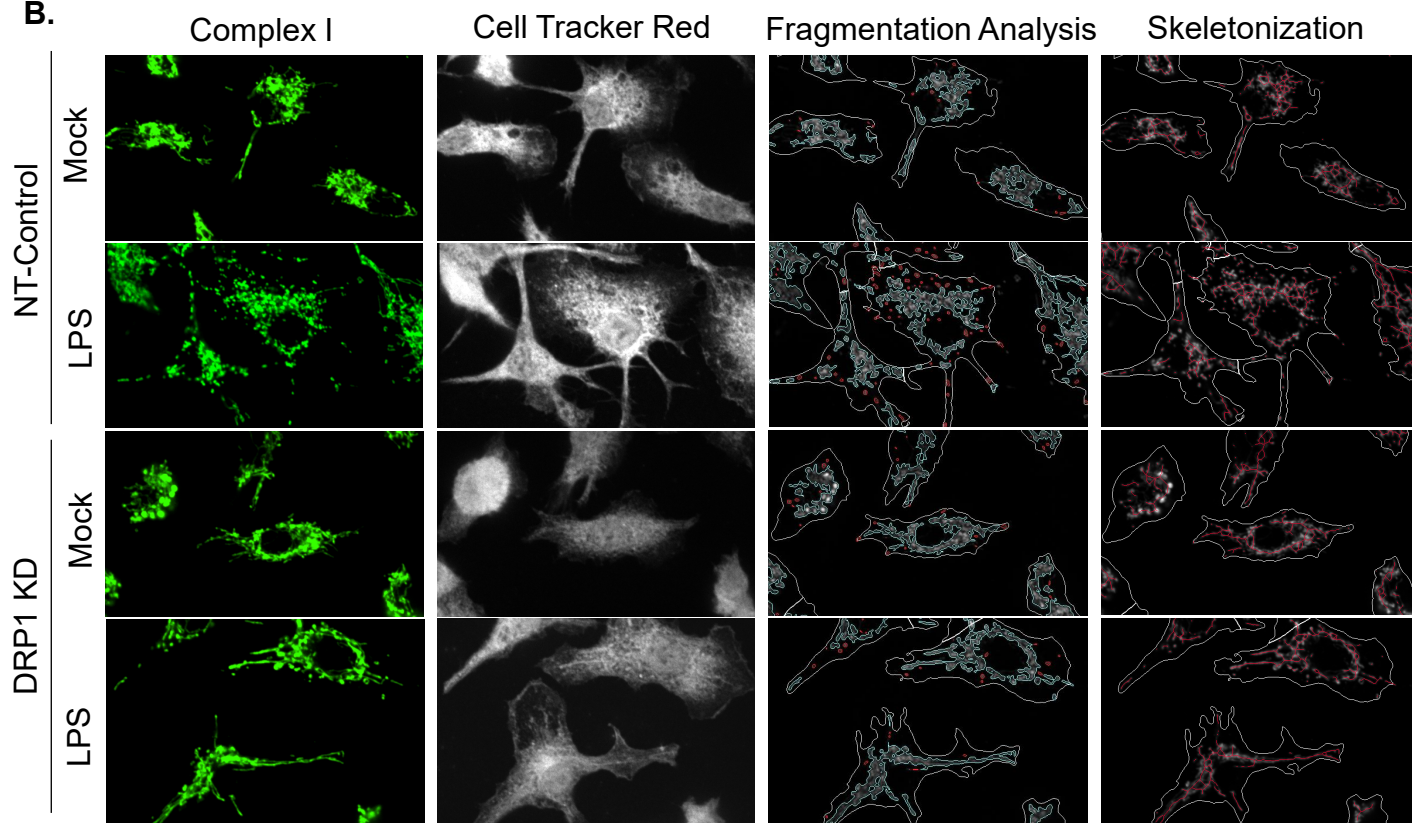

C.

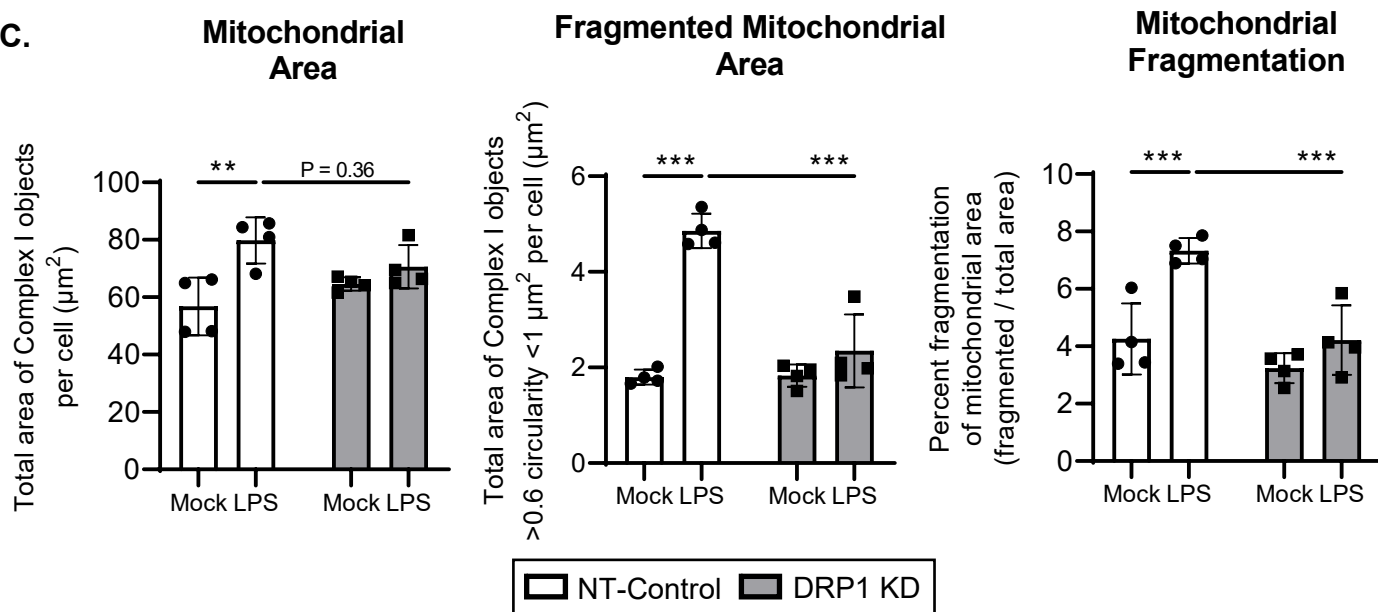

Fig. S3

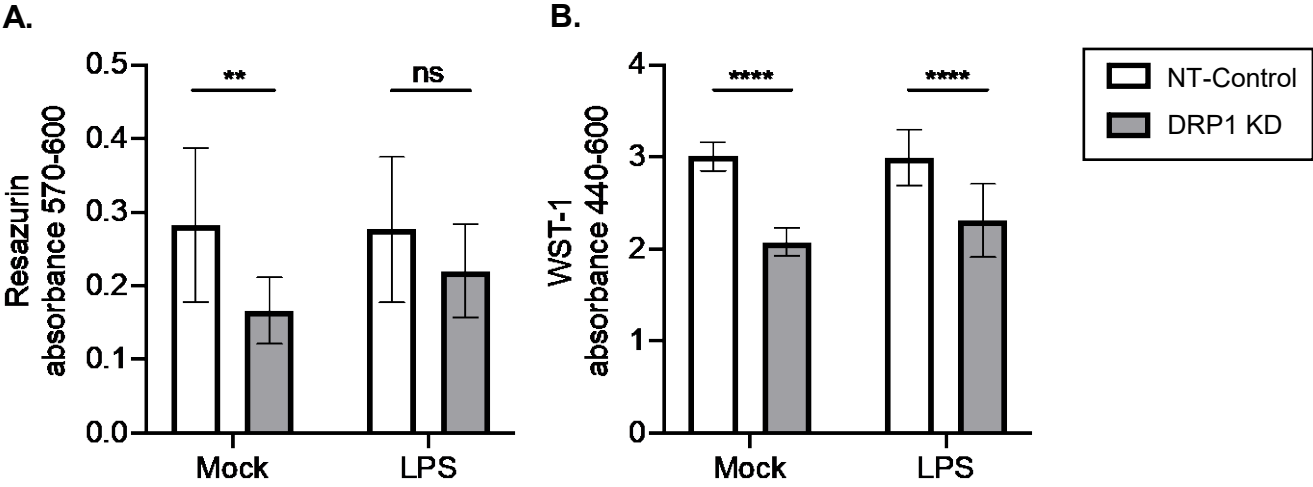

Fig. S4

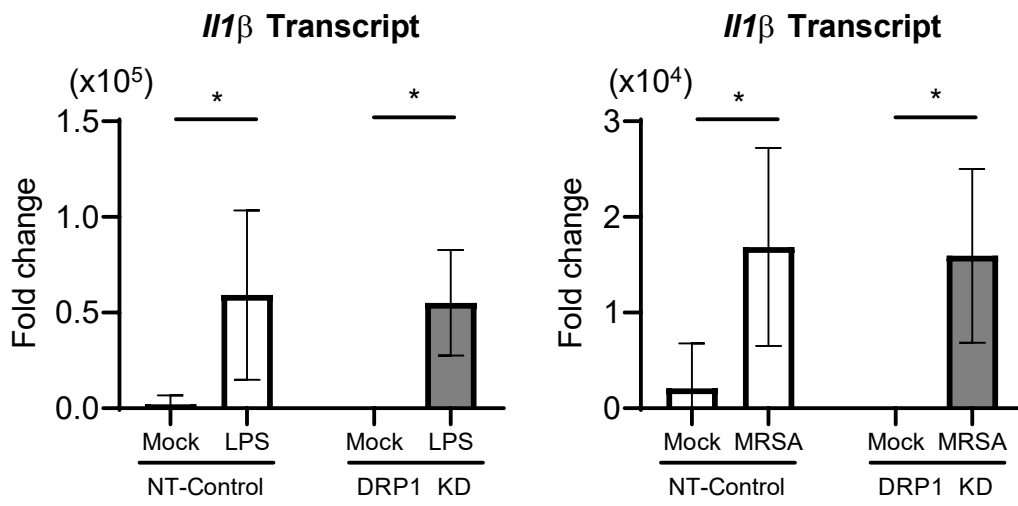

**Figure S1.** Immunoblot analysis of mitochondrial fission and fusion machinery in macrophages during LPS stimulation. **(A)** Immunoblot comparing DRP1 protein content in primary differentiation BMDM vs. DRP1 KD and NT-Control immortalized BMDM +/- 4h LPS stimulation (200 ng/ml). Lysates from equivalent numbers of cells ( $7.5 \times 10^4$ ) were loaded to control for cell type-intrinsic differences in protein content. **(B)** DRP1 abundance was quantified relative to mitochondrial content (TOM20) based on immunoblots. **(C)** Analysis of mitochondrial fission and fusion regulators in 4h LPS-stimulated macrophages by immunoblot. The abundance of DRP1 activating phosphorylation at Ser635, DRP1 inhibitory phosphorylation at Ser656, Mitochondrial fission factor (MFF), key mitochondrial fusion proteins, Mitofusion 2 (MFN2) and Optic atrophy 1 (OPA1), and mitochondrial OM marker TOM20 and matrix marker Pyruvate Dehydrogenase (PDH) were assessed. **(D)** Quantification of DRP1 Ser635 and Ser656 phosphorylation relative to total DRP1 (tDRP1) and TOM20, MFN2, OPA1, and MFF relative to GAPDH. Graphs are presented as the mean of  $n \geq 3$  independent experiments  $\pm$  SD. Two-way ANOVA with Sidak's multiple comparisons post-test was used to determine statistical significance.  $*P < 0.05$ ;  $**P < 0.01$ ;  $***P < 0.001$

**Figure S2.** Quantification of mitochondrial morphology using CellProfiler. **(A)** CellProfiler workflow for mitochondrial fragmentation and skeletonization analysis of Complex I immunofluorescence images. **(B)** Mitochondrial and total cell objects were segmented based on Complex I and Cell Tracker Red CMTPX stains, respectively. Representative processed images of NT-Control and DRP1 KD macrophages showing fragmented mitochondria in red and non-fragmented mitochondrial objects in teal overlaid on Complex I images. Similarly, skeletonized mitochondrial networks (red) are shown overlaid on Complex I images. Cells were left untreated (Mock) or stimulated with LPS (200 ug/ml) for 4h. **(C)** Quantification of mitochondrial fragmentation and length at the cell level. Fragmented mitochondria were classified based on mitochondrial object size and circularity. Mitochondrial objects with area less than  $1 \mu\text{m}^2$  and a circularity greater than 0.6 were considered fragmented for the purpose of quantification. Cell-level measurements of the number of fragmented mitochondrial objects, percentage of the mitochondrial area classified as fragmented, and the mean length of mitochondrial skeletons are reported as violin plots with the mean designated by a red line. **(D)** Area of total and fragmented mitochondrial objects per cell are reported as the experimental mean. Similarly, the mean percentage of mitochondrial objects classified as fragmented per cell is reported for each experiment. Graphs are presented as the mean of  $>100$  cells per condition across 4 independent experiments  $\pm$  SD. Since cell-level data did not follow a normal distribution,  $P$  values were calculated using direct comparison with the nonparametric Mann-Whitney/Wilcoxon rank sum test. Experimental averages were analyzed with two-way ANOVA with Sidak's post-test for multiple comparisons.  $**P < 0.01$ ;  $***P < 0.001$ ;  $****P < 0.0001$

**Figure S3.** Silencing DRP1 reduces cellular redox. NT-Control and DRP1 KD macrophages were left untreated (Mock) or stimulated with LPS (200 ng/ml) and cellular redox was assessed by using Resazurin **(A)** and WST-1 **(B)** substrates. Graphs indicate mean  $\pm$  SD of  $n \geq 3$  independent experiments. Two-way ANOVA with Sidak's multiple comparisons post-test was performed to calculate  $P$  values.  $**P < 0.01$ ;  $****P < 0.0001$

**Figure S4.** DRP1 knockdown does not affect LPS or MRSA-induced *I11 $\beta$*  transcription in macrophages. DRP1 KD and NT-Control macrophages were stimulated for 4h +/- LPS (200 ng/ml) or MRSA (MOI 20) and then the levels of *I11 $\beta$*  transcript were analyzed by RT-qPCR. Data were normalized against NT-Control macrophage untreated (Mock) condition. Graphs indicate mean  $\pm$  SD of  $n \geq 3$  independent experiments. Two-way ANOVA with Sidak's multiple comparisons post-test was performed to calculate  $P$  values.  $*P < 0.05$
